# Supplementary material for: Impact of Chemotherapy Exposure and DNMT3A Variants on Tumor Mutation Burden in Advanced Colorectal Cancer
Source: Research Square preprint supplement (doi:10.21203/rs.3.rs-7483602/v1), 2025-10-23
Supplement: Supplementary file 2 [file 7bbadb58d9fdc44b460ae0af.xlsx]

## Sheet: overview
Supplementary Table 1. Overview of ClinicalFeature data
case_number	age	sex	family history of colorectal cancer	multiple primary cancer	multiple cancer	alcohol_habitat	Smoking_habitat	Diagnosis	T	N	M	TNM stage	histology	differentiation	primary location	RAS status	MSI status	TMB (mutation/Mb)	Total_variant_number	missense	amplification	nonsense	frameshift	nonframeshift	splice	rearrangement	loss	truncation	therapeutic modulation for CGP test sample	Number of therapeutic modulation	Number of therapeutic regime	Chemotherpeutic history before CGP test	Type of CGP test	CGP provided sorce
case_1	60	male	none	none	none	Occasional	Never	sigmoid colon cancer	4	0	0	IIC	adenocarcinoma	moderate	Left	wild	MSS	3.78	18	9	5	1	2	1	0	0	0	0	yes	2	1	yes	FoundationOneCDX	primary
case_2	62	male	none	none	none	Regular	Regular	sigmoid colon cancer	3	2	0	IIIB	adenocarcinoma	moderate	Left	RASm	MSS	6.3	15	11	0	2	0	1	1	0	0	0	no	0	0	no	FoundationOneCDX	primary
case_3	80	female	yes	none	none	Never	Never	ascending colon cancer	2	1	0	IIIA	adenocarcinoma	moderate	Right	wild	MSS	3.78	15	8	5	2	0	0	0	0	0	0	no	0	0	no	FoundationOneCDX	primary
case_4	48	female	none	none	none	Never	Regular	ascending colon cancer	3	0	1	IV	adenocarcinoma	moderate	Right	RASm	MSS	2.52	25	8	9	2	1	2	0	0	0	0	no	0	0	no	FoundationOneCDX	primary
case_5	56	male	none	none	none	Regular	Regular	sigmoid colon cancer	3	2	0	IIIB	adenocarcinoma	well	Left	wild	MSS	6.3	20	7	10	0	2	0	1	0	0	0	no	0	0	no	FoundationOneCDX	primary
case_6	47	male	yes	none	none	Never	Regular	rectal cancer	3	2	1	IV	adenocarcinoma	well	Left	wild	MSS	8.83	16	10	2	1	1	0	1	1	0	0	yes	NA	1	yes	FoundationOneCDX	primary
case_7	61	male	yes	none	none	Regular	Regular	transverse colon cancer	3	0	1	IV	adenocarcinoma	moderate	Right	RASm	MSS	6.3	10	8	0	1	1	0	0	0	0	0	yes	NA	1	yes	FoundationOneCDX	primary
case_8	48	female	none	none	none	Never	Never	discending colon cancer	4	0	1	IV	adenocarcinoma	NA	Left	RASm	MSS	3.78	10	7	0	2	0	1	0	0	0	0	no	0	0	no	FoundationOneCDX	primary
case_9	65	male	none	none	none	Never	Never	sigmoid colon cancer	4	1	1	IV	adenocarcinoma	NA	Left	wild	MSS	3.78	24	11	8	2	2	0	0	0	0	0	no	0	0	no	FoundationOneCDX	metastasis
case_10	56	female	none	none	none	Never	Never	sigmoid colon cancer	3	NA	1	IV	adenocarcinoma	well	Left	wild	MSS	2.53	11	9	0	0	0	0	1	1	0	0	no	0	0	no	FoundationOneCDX	primary
case_11	50	male	none	none	none	Regular	Regular	sigmoid colon cancer	4	0	0	IV	adenocarcinoma	well	Left	wild	MSS	1.26	9	6	0	1	1	0	1	0	0	0	yes	6	1	yes	FoundationOneCDX	primary
case_12	57	male	none	none	none	Never	Never	sigmoid colon cancer	4	2	1	IV	adenocarcinoma	moderate	Left	wild	MSS	12.64	26	17	0	2	4	2	0	0	0	0	yes	NA	3	yes	FoundationOneLiquidCDX	blood
case_13	53	male	none	none	none	Never	Never	rectal cancer	NA	NA	0	III	adenocarcinoma	NA	Left	RASm	MSS	8.83	30	13	12	1	1	1	0	1	1	0	yes	20	2	no	FoundationOneCDX	primary
case_14	52	female	yes	none	none	Never	Never	rectal cancer	3	0	1	IV	adenocarcinoma	well	Left	wild	MSS	6.3	28	14	9	3	1	1	0	0	0	0	yes	6	2	yes	FoundationOneCDX	metastasis
case_15	37	male	none	none	none	Never	Never	sigmoid colon cancer	4	1	0	IIIa	adenocarcinoma	NA	Left	wild	MSS	1.26	4	3	0	0	0	1	0	0	0	0	no	0	0	no	FoundationOneLiquidCDX	blood
case_16	74	female	none	none	none	Never	Regular	rectal cancer	2	0	0	II	adenocarcinoma	NA	Left	RASm	MSS	5.04	18	8	7	1	2	0	0	0	0	0	yes	16	2	no	FoundationOneCDX	metastasis
case_17	65	male	none	none	none	Regular	Regular	rectal cancer	3	3	1	IV	adenocarcinoma	NA	Left	wild	MSS	15.17	26	15	2	2	2	1	1	2	1	0	yes	NA	4	yes	FoundationOneLiquidCDX	blood
case_18	74	male	none	Thymic Tumor	none	Regular	Past	cecal cancer	3	1	1	IVa	adenocarcinoma	NA	Right	wild	MSS	6.3	14	13	0	0	0	0	0	1	0	0	no	0	0	yes	FoundationOneCDX	primary
case_19	69	female	yes	none	none	Never	Never	rectal cancer	1	0	0	I	adenocarcinoma	NA	Left	wild	MSS	2.53	14	9	0	2	2	0	0	1	0	0	yes	29	2	yes	FoundationOneLiquidCDX	blood
case_20	61	male	none	none	none	Regular	Regular	ascending colon cancer	3	2	0	IIIb	adenocarcinoma	NA	Right	RASm	MSS	1.26	12	3	3	2	3	0	0	0	0	0	no	0	0	yes	FoundationOneCDX	primary
case_21	61	male	yes	Prostate Cancer	none	Regular	Past	rectal cancer	1	0	0	I	adenocarcinoma	NA	Left	RASm	MSS	1.26	17	13	0	3	1	0	0	0	0	0	yes	16	3	yes	FoundationOneLiquidCDX	blood
case_22	77	male	none	none	none	Never	Past	sigmoid colon cancer	4	2	1	IV	adenocarcinoma	well	Left	RASm	MSS	8.85	25	18	1	2	2	0	2	0	0	0	yes	13	2	yes	FoundationOneLiquidCDX	blood
case_23	61	female	none	none	none	Never	Past	rectal cancer	3	0	1	IV	adenocarcinoma	moderate	Left	wild	MSS	1.21	9	7	0	0	1	1	0	0	0	0	yes	NA	8	yes	FoundationOneCDX	metastasis
case_24	51	female	none	none	none	Never	Never	rectal cancer	3	3	0	IIIb	adenocarcinoma	moderate	Left	RASm	MSS	0	9	6	1	1	1	0	0	0	0	0	yes	NA	1	yes	FoundationOneCDX	primary
case_25	63	male	none	none	none	Never	Never	rectal cancer	NA	NA	1	IV	adenocarcinoma	moderate	Left	RASm	MSS	0	14	11	0	2	1	0	0	0	0	0	no	0	0	yes	FoundationOneLiquidCDX	blood
case_26	69	male	none	none	none	Never	Past	rectal cancer	NA	NA	1	IV	adenocarcinoma	NA	Left	wild	MSS	7.57	14	9	3	0	1	0	1	0	0	0	yes	NA	1	no	FoundationOneCDX	metastasis
case_27	63	male	yes	none	none	Never	Never	sigmoid colon cancer rectal cancer	4	2	1	IV	adenocarcinoma	NA	Left	wild	MSS	5.04	22	6	8	3	0	0	0	3	2	0	yes	NA	1	yes	FoundationOneCDX	metastasis
case_28	63	female	yes	none	none	Never	Never	transverse colon cancer	4	1	0	IIIb	adenocarcinoma	NA	Right	RASm	MSS	2.52	14	10	2	0	0	0	2	0	0	0	no	0	0	no	FoundationOneCDX	metastasis
case_29	63	male	none	none	none	Never	Regular	rectal cancer	3	2	0	IIIc	adenocarcinoma	well	Left	RASm	MSS	0	13	8	3	0	2	0	0	0	0	0	no	0	0	yes	FoundationOneCDX	primary
case_30	68	male	none	none	none	Never	Past	rectal cancer	4	3	0	IIIc	adenocarcinoma	muc	Left	wild	MSS	0	9	8	0	1	0	0	0	0	0	0	yes	2		yes	FoundationOneLiquidCDX	blood
case_31	64	female	none	none	none	Never	Never	sigmoid colon cancer	4	1	0	IIIb	adenocarcinoma	NA	Left	RASm	MSS	6.3	17	13	1	1	1	1	0	0	0	0	yes	12	1	yes	FoundationOneCDX	metastasis
case_32	74	female	yes	none	none	Never	Never	ascending colon cancer	3	1	1	IVb	adenocarcinoma	well	Right	RASm	MSS	7.56	9	4	0	1	2	0	1	0	0	1	no	0	0	yes	FoundationOneCDX	metastasis
case_33	60	female	yes	none	none	Never	Never	sigmoid colon cancer	NA	NA	1	IV	adenocarcinoma	moderate	Left	wild	MSS	11.38	30	21	2	1	1	2	1	1	0	0	yes	NA	6	yes	FoundationOneCDX	blood
case_34	58	male	none	none	none	Never	Never	sigmoid colon cancer	NA	NA	0	III	adenocarcinoma	NA	Left	RASm	MSS	2.52	21	8	11	0	1	1	0	0	0	0	no	0	0	yes	FoundationOneCDX	primary
case_35	57	male	yes	none	none	Never	Never	rectal cancer	2	0	0	II	adenocarcinoma	NA	Left	RASm	MSS	2.52	16	10	0	1	3	0	0	0	1	1	no	0	0	yes	FoundationOneCDX	primary
case_36	61	female	none	none	none	Never	Past	rectal cancer	3	0	1	IV	adenocarcinoma	NA	Left	RASm	MSS	1.21	9	7	0	0	2	1	0	1	0	0	yes	NA	2	yes	FoundationOneCDX	metastasis
case_37	51	female	none	none	none	Occasional	Never	rectal cancer	3	3	0	III	adenocarcinoma	moderate	Left	RASm	MSS	0	9	6	1	1	1	0	0	0	0	0	yes	NA		yes	FoundationOneCDX	primary
case_38	71	male	NA	none	none	Occasional	Never	rectal cancer	NA	NA	1	IV	adenocarcinoma	NA	Left	wild	MSS	6.63	13	7	2	2	2	0	0	0	0	0	yes	8	1	yes	FoundationOneCDX	metastasis
case_39	50	male	yes	none	none	Regular	Regular	sigmoid colon cancer	4	3	1	IV	adenocarcinoma	NA	Left	RASm	MSS	2.41	17	14	0	1	1	0	1	0	0	0	no	0	0	no	FoundationOneCDX	primary
case_40	75	female	none	none	none	Never	Never	sigmoid colon cancer	4	2	1	IVa	adenocarcinoma	well	Left	wild	MSS	4.83	13	9	0	0	3	1	2	0	0	0	yes	5	1	yes	FoundationOneCDX	metastasis
case_41	48	female	yes	none	none	Never	Past	transverse colon cancer	NA	NA	0	III	adenocarcinoma	NA	Right	RASm	MSS	26.55	34	16	10	4	3	0	1	0	0	0	yes	20	4	yes	FoundationOneCDX	metastasis
case_42	54	male	yes	Follicular Lymphoma	none	Never	Never	sigmoid colon cancer	NA	NA	0	III	adenocarcinoma	NA	Left	RASm	MSS	3.62	12	9	0	1	1	1	0	0	0	0	no	0	0	no	FoundationOneCDX	primary
case_43	73	female	yes	none	none	Never	Never	rectal cancer	4	NA	1	IV	adenocarcinoma	NA	Left	RASm	MSS	4.83	13	13	1	0	0	0	0	0	0	0	yes	NA	4	yes	FoundationOneCDX	primary
case_44	64	female	yes	none	none	Occasional	Never	sigmoid colon cancer	NA	NA	1	IV	adenocarcinoma	NA	Left	wild	MSS	3.79	13	10	1	1	1	0	1	1	0	0	yes	NA	9	yes	FoundationOneLiquidCDX	blood
case_45	79	male	none	none	none	Never	Never	rectal cancer	4	2	0	IIIb	adenocarcinoma	moderate	Left	RASm	MSS	1.21	23	10	8	2	2	1	0	0	0	0	no	0	0	no	FoundationOneCDX	primary
case_46	71	female	none	none	none	Never	Never	ascending colon cancer	3	2	0	IIIc	adenocarcinoma	well	Right	RASm	MSS	3.62	25	11	9	3	1	0	0	0	0	0	no	0	0	no	FoundationOneCDX	metastasis
case_47	47	male	none	none	none	Never	Never	rectal cancer	4	3	1	IV	adenocarcinoma	NA	Left	RASm	MSS	1.21	12	6	0	3	2	1	0	0	0	0	no	0	0	no	FoundationOneCDX	primary
case_48	68	male	none	none	none	Regular	Past	sigmoid colon cancer	NA	NA	0	III	adenocarcinoma	NA	Left	wild	MSS	2.41	19	6	8	2	0	0	1	1	0	1	yes	NA	3	yes	FoundationOneCDX	metastasis
case_49	63	female	yes	none	none	Regular	Regular	transverse colon cancer	NA	NA	1	IV	adenocarcinoma	NA	Right	wild	MSS	7.24	12	9	0	2	0	0	0	1	0	0	yes	NA	4	yes	FoundationOneCDX	metastasis
case_50	47	female	none	Breast Cancer	none	Never	Past	transverse colon cancer	NA	NA	0	III	adenocarcinoma	NA	Right	wild	MSS	0	13	5	6	1	1	0	0	0	0	0	no	0	0	yes	FoundationOneCDX	primary
